# Supplementary material for: Increasing the effective energy barrier promoted by the change of a counteranion in a Zn–Dy–Zn SMM: slow relaxation via the second excited state
Source: Royal Society of Chemistry journal article supplement (doi:10.1039/c5cc04495b), 2015-01-01
Supplement: c5cc04495b1.pdf [file c5cc04495b1.pdf]

## **ELECTRONIC SUPPLEMENTARY INFORMATION**

### **Raising of the effective energy barrier promoted by the change of counteranion in a Zn-Dy-Zn SMM: Slow relaxation via the second excited state**

I. Oyarzabal, J. Ruiz, E. Ruiz, D. Aravena, E. Colacio and J. M. Seco

### Synthetic procedures

All reagents were obtained from commercial sources and used as received. The ligand H<sub>2</sub>L (N,N'-dimethyl-N,N'-bis(2-hydroxy-3-formyl-5-bromo-benzyl)ethylenediamine) was prepared following a reported procedure.<sup>1</sup>

- (1) M. Yonemura, Y. Matsumura, M. Ohba, H. Okawa and D. E. Fenton, *Chem. Lett.* 1996, 601.

### Synthesis of **1**

To a solution of ZnCl<sub>2</sub> (8.5 mg, 0.0625 mmol) in 5 mL of MeOH were subsequently added with continuous stirring 64 mg (0.125 mmol) of H<sub>2</sub>L, 27.4 mg (0.0625 mmol) of Dy(NO<sub>3</sub>)<sub>3</sub>·5H<sub>2</sub>O and 23 mg (0.125 mmol) of KPF<sub>6</sub>. The resulting solution was filtered and allowed to stand at room temperature. After several days, well-formed prismatic yellow crystals of **1** were obtained, which were filtered off and dried in vacuum. Yield: 19%. Anal. Calcd. for C<sub>40</sub>H<sub>40</sub>N<sub>4</sub>O<sub>8</sub>Br<sub>4</sub>Cl<sub>2</sub>PF<sub>6</sub>DyZn<sub>2</sub>: C, 31.33; H, 2.63; N, 3.65. Found: C, 31.51; H, 2.67; N, 3.72.

### Physical measurements

Elemental (C, H, and N) analyses were performed on a Leco CHNS-932 microanalyzer. IR spectra of powdered samples were recorded in the 400-4000 cm<sup>-1</sup> region on a Nicolet 6700 FTIR spectrophotometer using KBr pellets. Variable-temperature magnetic susceptibility (2-300 K) and magnetization measurements at 2 K and different magnetic fields (0-50 kOe) were carried out with a Quantum Design SQUID MPMS XL5 magnetometer. Diamagnetic corrections were estimated from the Pascal's constants. Alternating current magnetic measurements in a 3.5 G ac field were performed on a PPMS (Physical Property measurement System) - Quantum Design Model 6000.

### Crystallographic data and Refinement

X-ray crystal data for **1** were collected with an Agilent Technologies Super-Nova diffractometer, which was equipped with monochromated Mo K $\alpha$  radiation ( $\lambda$  = 0.71069 Å) and Eos CCD detector. Data frames were processed (unit cell determinations, intensity data integrations, routine corrections for Lorentz and polarization effects and analytical absorption corrections) using the CrysAlis Pro software package.<sup>2</sup> The structures were solved by direct methods and refined by full-matrix least-squares with SHELXL-97.<sup>3</sup>

Final  $R(F)$ ,  $wR(F^2)$  and goodness of fit agreement factors, details of the data collection and analysis can be found in Table S1. Selected bond lengths and angles are given in Table S2.

(2) *CrysAlisPro Software System*, Agilent Technologies UK Ltd, Oxford, UK, 2012.

(3) G. M. Sheldrick, *Acta Crystallogr., Sect. A: Fundam. Crystallogr.*, 2008, **64**, 112.

**Table S1.-** Crystallographic data for **1**.

| Compound                                                 | <b>1</b>                                                                                                                        |
|----------------------------------------------------------|---------------------------------------------------------------------------------------------------------------------------------|
| Formula                                                  | C <sub>40</sub> H <sub>40</sub> Br <sub>4</sub> Cl <sub>2</sub> DyF <sub>6</sub> N <sub>4</sub> O <sub>8</sub> PZn <sub>2</sub> |
| $M_r$                                                    | 1533.51                                                                                                                         |
| Crystal system                                           | Monoclinic                                                                                                                      |
| Space group (no.)                                        | C2/c (15)                                                                                                                       |
| $a$ (Å)                                                  | 17.1014(2)                                                                                                                      |
| $b$ (Å)                                                  | 18.2552(3)                                                                                                                      |
| $c$ (Å)                                                  | 15.9346(2)                                                                                                                      |
| $\alpha$ (°)                                             | 90.00                                                                                                                           |
| $\beta$ (°)                                              | 97.4595(12)                                                                                                                     |
| $\gamma$ (°)                                             | 90.00                                                                                                                           |
| $V$ (Å <sup>3</sup> )                                    | 4932.51(11)                                                                                                                     |
| $Z$                                                      | 4                                                                                                                               |
| $D_c$ (g cm <sup>-3</sup> )                              | 2.065                                                                                                                           |
| $\mu$ (MoK $\alpha$ ) (mm <sup>-1</sup> )                | 5.921                                                                                                                           |
| $T$ (K)                                                  | 100(2)                                                                                                                          |
| Observed reflections                                     | 4336 (3679)                                                                                                                     |
| $R_{int}$                                                | 0.0393                                                                                                                          |
| Parameters                                               | 310                                                                                                                             |
| $GOF$                                                    | 1.048                                                                                                                           |
| $R_1^{a,b}$                                              | 0.0412 (0.0307)                                                                                                                 |
| $wR_2^c$                                                 | 0.0653 (0.0613)                                                                                                                 |
| Largest difference in peak and hole (e Å <sup>-3</sup> ) | 0.891 and -0.540                                                                                                                |

<sup>a</sup>  $R_1 = \Sigma ||F_o| - |F_c|| / \Sigma |F_o|$ .

<sup>b</sup> Values in parentheses for reflections with  $I > 2\sigma(I)$ .

<sup>c</sup>  $wR_2 = \{\Sigma [w(F_o^2 - F_c^2)^2] / \Sigma [w(F_o^2)^2]\}^{1/2}$

**Table S2.-** Selected bond lengths (Å) and angles (°) for **1**.

| Compound          | <b>1</b>  |
|-------------------|-----------|
| Dy(1)-Zn(1)       | 3.550(1)  |
| Dy(1)-O(1)        | 2.393(3)  |
| Dy(1)-O(2)        | 2.340(3)  |
| Dy(1)-O(3)        | 2.275(3)  |
| Dy(1)-O(4)        | 2.386(3)  |
| Zn(1)-N(1)        | 2.153(3)  |
| Zn(1)-N(2)        | 2.106(3)  |
| Zn(1)-O(2)        | 2.066(3)  |
| Zn(1)-O(3)        | 2.138(3)  |
| Zn(1)-Cl(1)       | 2.217(1)  |
| Dy(1)-O(2)-Zn(1)  | 107.2(1)  |
| Dy(1)-O(3)-Zn(1)  | 107.1(1)  |
| Zn(1)-Dy(1)-Zn(1) | 109.48(1) |
| O(1)-Dy(1)-O(2)   | 71.8(1)   |
| O(1)-Dy(1)-O(4)   | 77.6(1)   |
| O(2)-Dy(1)-O(3)   | 68.1(1)   |
| O(3)-Dy(1)-O(4)   | 73.0(1)   |
| O(2)-Zn(1)-O(3)   | 75.9(1)   |
| O(2)-Zn(1)-Cl(1)  | 107.62(9) |
| O(3)-Zn(1)-Cl(1)  | 101.78(8) |

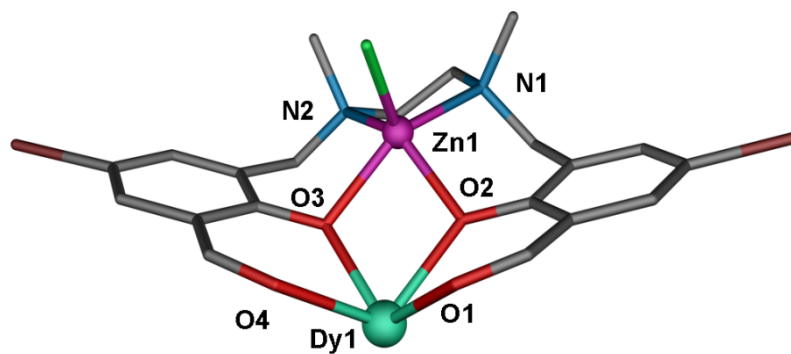

The [ZnCl(L)Dy]<sup>2+</sup> subunit with the labelling used in Table S2.

### Computational details

Low-energy spectra and g factors of the eight lowest Kramers doublets of **1** were obtained by means of CASSCF+RASSI calculations, as implemented in the MOLCAS 7.8 software package.<sup>4</sup> The method is divided in two steps: 1) CASSCF(9,7) calculations for three different multiplicities (sextet, quartet and doublet), 2) The effect of spin-orbit coupling on the basis of the converged wavefunctions obtained in the previous step is included by the restricted active space state interaction (RASSI) method. Spin Hamiltonian parameters (such as g factors) can be calculated from the wavefunctions resulting from the state interaction step employing the SINGLE ANISO program. We included 21, 128 and 98 roots for the sextet, quartet and doublet CASSCF calculations, while the employed basis set has the following contractions: Dy[9s8p6d4f3g2h]; Br [4s3p2d1f]; Zn [4s3p2d1f]; Cl [4s3p1d]; O [4s3p2d1f]; N [4s3p2d1f]; C [3s2p]; H [2s]. The structure of the model was extracted from the corresponding X-ray structure without any ligand truncation. Electrostatic potential maps were obtained by DFT calculations (functional: B3LYP, basis: TZVP, program: Gaussian09),<sup>5</sup> employing the geometry for the ligand environment of the previous CASSCF+RASSI calculations and removing the DyIII ion.

- (4) F. Aquilante, L. De Vico, N. Ferré, G. Ghigo, P.-Å. Malmqvist, P. Neogrády, T. B. Pedersen, M. Pitoňák, M. Reiher, B. O. Roos, L. Serrano-Andrés, M. Urban, V. Veryazov and R. J. Lindh, *Comput. Chem.* 2010, **31**, 224.
- (5) Gaussian 09, M. J. Frisch, G. W. Trucks, H. B. Schlegel, G. E. Scuseria, M. A. Robb, J. R. Cheeseman, G. Scalmani, V. Barone, B. Mennucci, G. A. Petersson, H. Nakatsuji, M. Caricato, X. Li, H. P. Hratchian, A. F. Izmaylov, J. Bloino, G. Zheng, J. L. Sonnenberg, M. Hada, M. Ehara, K. Toyota, R. Fukuda, J. Hasegawa, M. Ishida, T. Nakajima, Y. Honda, O. Kitao, H. Nakai, T. Vreven, J. A. Montgomery, J. E. Peralta, F. Ogliaro, M. Bearpark, J. J. Heyd, E. Brothers, K. N. Kudin, V. N. Staroverov, R. Kobayashi, J. Normand, K. Raghavachari, A. Rendell, J. C. Burant, S. S. Iyengar, J. Tomasi, M. Cossi, N. Rega, N. J. Millam, M. Klene, J. E. Knox, J. B. Cross, V. Bakken, C. Adamo, J. Jaramillo, R. Gomperts, R. E. Stratmann, O. Yazyev, A. J. Austin, R. Cammi, C. Pomelli, J. W. Ochterski, R. L. Martin, K. Morokuma, V. G. Zakrzewski, G. A. Voth, P. Salvador, J. J. Dannenberg, S. Dapprich, A. D. Daniels, Ö. Farkas, J. B. Foresman, J. V. Ortiz, J. Cioslowski and D. J. Fox, Gaussian: Wallingford, CT, 2009.

**Table S3.-** Continuous Shape Measures Calculations for LnO<sub>8</sub> coordination environment in compounds **1** and **1 a**

Compound 1

|          |        |                                        |
|----------|--------|----------------------------------------|
| OP-8     | 1 D8h  | Octagon                                |
| HPY-8    | 2 C7v  | Heptagonal pyramid                     |
| HBPY-8   | 3 D6h  | Hexagonal bipyramid                    |
| CU-8     | 4 Oh   | Cube                                   |
| SAPR-8   | 5 D4d  | Square antiprism                       |
| TDD-8    | 6 D2d  | Triangular dodecahedron                |
| JGBF-8   | 7 D2d  | Johnson gyrobifastigium J26            |
| JETBPY-8 | 8 D3h  | Johnson elongated triangular bipyramid |
| J14      |        |                                        |
| JBTPR-8  | 9 C2v  | Biaugmented trigonal prism J50         |
| BTPR-8   | 10 C2v | Biaugmented trigonal prism             |
| JSD-8    | 11 D2d | Snub diphendoid J84                    |
| TT-8     | 12 Td  | Triakis tetrahedron                    |
| ETBPY-8  | 13 D3h | Elongated trigonal bipyramid           |

Compound 1

| Structure [ML8 ] | OP-8   | HPY-8   | HBPY-8  |
|------------------|--------|---------|---------|
| CU-8             | SAPR-8 | TDD-8   | JGBF-8  |
| JBTPR-8          | BTPR-8 | JSD-8   | TT-8    |
| T14              |        |         | ETBPY-8 |
| 10.538,          | 0.547, | 30.192, | 23.090, |
| 3.365,           | 2.716, | 2.870,  | 15.239, |
|                  |        | 5.868,  | 11.334, |
|                  |        |         | 16.569, |
|                  |        |         | 26.011, |
|                  |        |         | 21.716  |

Compound 1a

| ETBPY-8 | TT-8   | JSD-8  | BTPR-8  | JBTPR-8 | JETBPY-8 | JGBF-8  |
|---------|--------|--------|---------|---------|----------|---------|
| 24.742, | 8.029, | 5.750, | 2.862,  | 3.321,  | 29.125,  | 15.237, |
|         |        |        |         |         |          |         |
| TDD-8   | SAPR-8 | CU-8   | HBPY-8  | HPY-8   | OP-8     |         |
| 2.173,  | 0.927, | 7.165, | 13.663, | 21.555, | 31.300   |         |

**Table S4.-** Continuous Shape Measures Calculations for ZnN<sub>2</sub>O<sub>2</sub>Cl coordination environment in compound **1**.

Compound 1

|         |       |                                |
|---------|-------|--------------------------------|
| PP-5    | 1 D5h | Pentagon                       |
| vOC-5   | 2 C4v | Vacant octahedron              |
| TBPY-5  | 3 D3h | Trigonal bipyramid             |
| SPY-5   | 4 C4v | Spherical square pyramid       |
| JTBPY-5 | 5 D3h | Johnson trigonal bipyramid J12 |

|                  |         |         |        |        |
|------------------|---------|---------|--------|--------|
| Structure [ML5 ] |         | PP-5    | vOC-5  | TBPY-5 |
| SPY-5            | JTBPY-5 |         |        |        |
| T14              | ,       | 32.506, | 3.519, | 4.070, |
| 0.678,           | 7.170   |         |        |        |

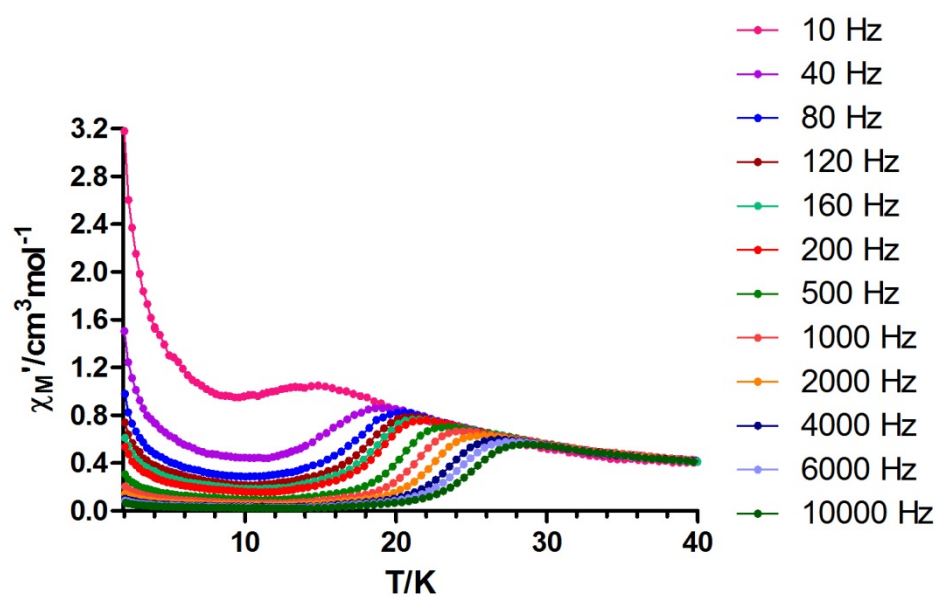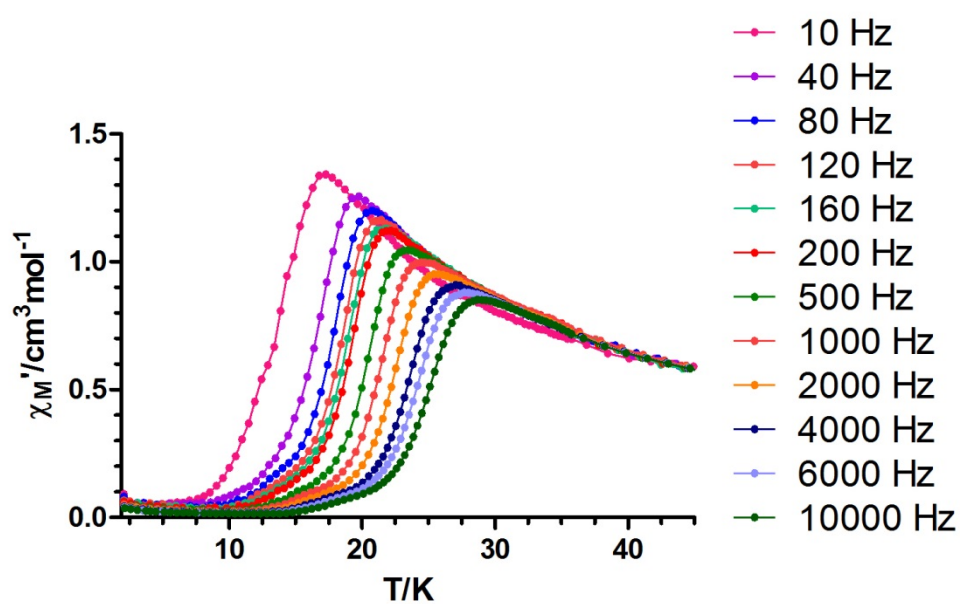

**Figure S1.**-Temperature dependence of the molar in-phase ac susceptibility ( $\chi_M'$ ) for **1** under zero (up) and 1000 Oe (bottom) *dc* applied field at different frequencies.

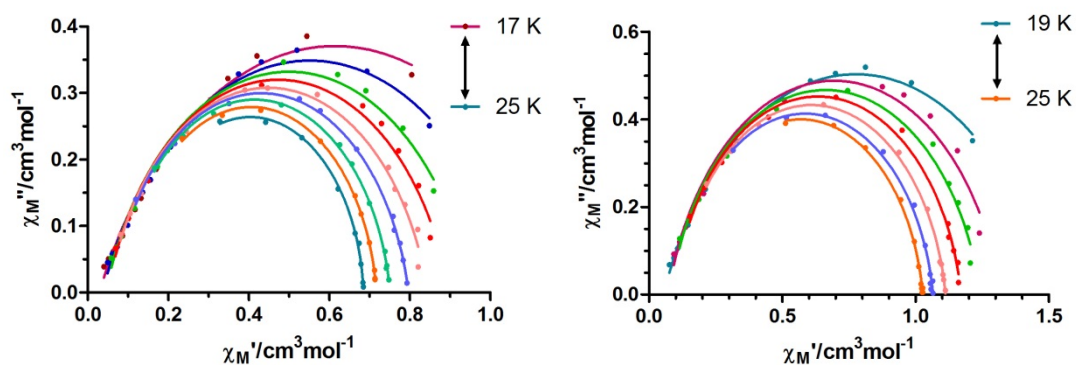

**Figure S2.**- Cole-Cole plot for **1** under zero (left) and 1000 Oe (right) *dc* applied field at different temperatures.

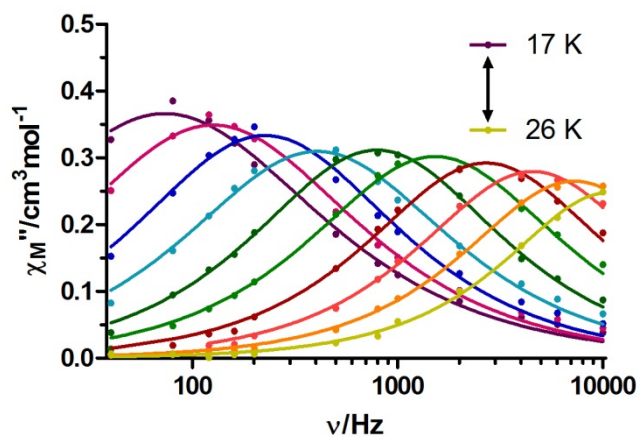

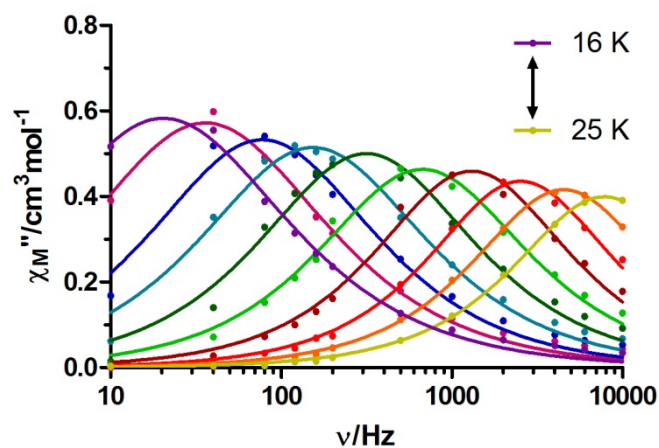

Figure S3.-Frequency dependence of the molar out-of-phase ac susceptibility ( $\chi_M''$ ) for **1** under zero (up) and 1000 Oe (bottom) *dc* applied field at different temperatures.

Table S5.- Calculated energies ( $\text{cm}^{-1}$ ) and g-factors for the eight lowest Kramers' doublets.

| Doublet | Energy ( $\text{cm}^{-1}$ ) | $g_z$  | $g_y$ | $g_x$  | Angle wrt. Ground doublet (degrees) |
|---------|-----------------------------|--------|-------|--------|-------------------------------------|
| 1       | 0.0                         | 19.636 | 0.000 | 0.000  | -                                   |
| 2       | 144.2                       | 16.561 | 0.045 | 0.041  | 2.4                                 |
| 3       | 243.3                       | 11.630 | 4.457 | 1.959  | 47.5                                |
| 4       | 264.7                       | 8.895  | 3.944 | 2.703  | 61.9                                |
| 5       | 323.3                       | 6.866  | 2.722 | 0.859  | 14.8                                |
| 6       | 347.4                       | 2.488  | 8.210 | 11.024 | 22.7                                |
| 7       | 369.2                       | 19.499 | 0.737 | 0.428  | 89.9                                |
| 8       | 491.8                       | 19.581 | 0.002 | 0.001  | 53.1                                |

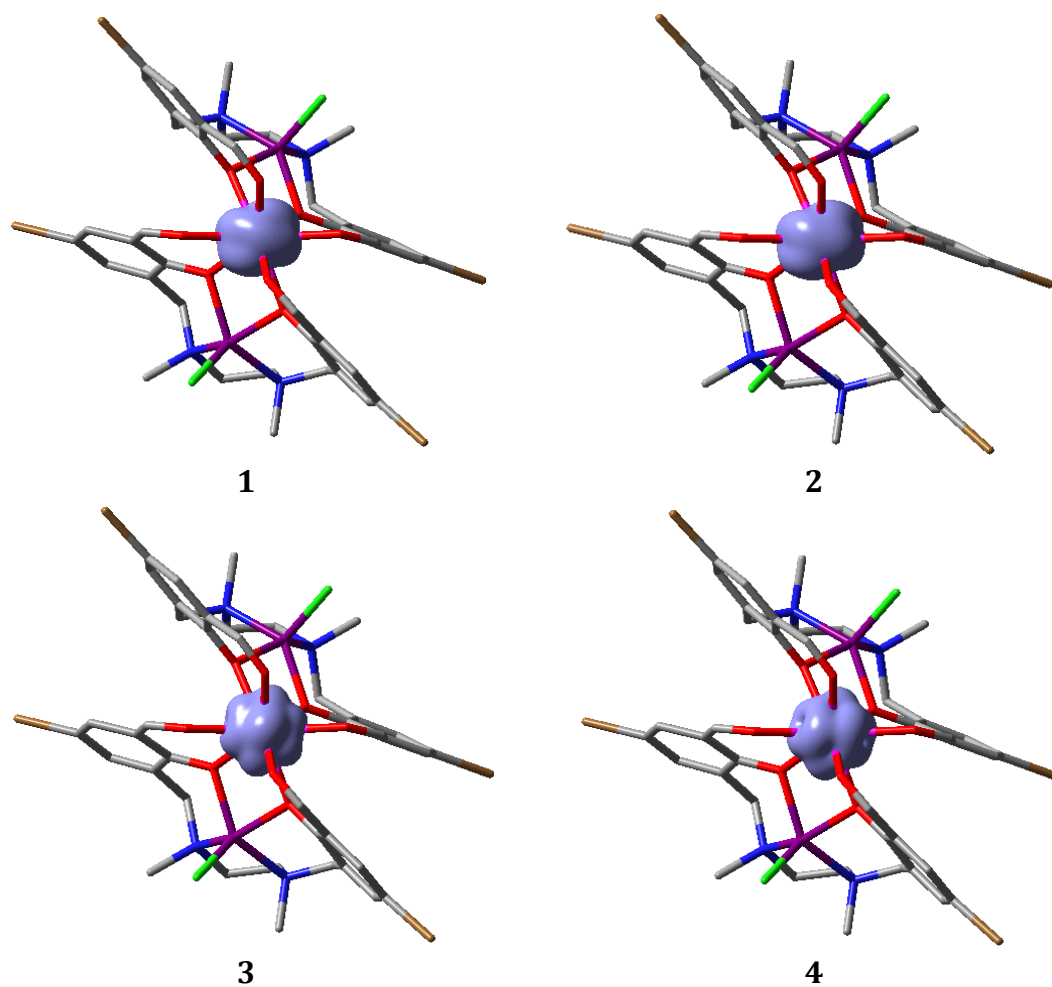

**Figure S4.-** Beta spin density of the Dy<sup>III</sup> f electrons for the first 4 non-relativistic states.

**Table S6.-** First excitation energies (cm<sup>-1</sup>) from the states stemming from the ground <sup>6</sup>H term at CASSCF level.

| State | Energy (cm <sup>-1</sup> ) |
|-------|----------------------------|
| 1     | 0.0                        |
| 2     | 0.6                        |
| 3     | 200.6                      |
| 4     | 236.2                      |
| 5     | 305.5                      |
| 6     | 346.1                      |
| 7     | 394.5                      |
| 8     | 418.3                      |
| 9     | 424.7                      |
| 10    | 562.1                      |

**[ZnCl(μ-L)Dy(μ-L)ClZn][ZnCl<sub>3</sub>(CH<sub>3</sub>OH)]**

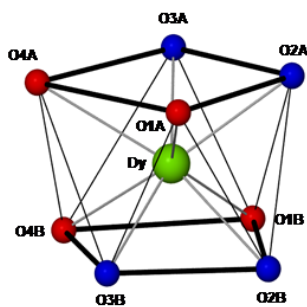

Dy-O(1A) = 2.397(4) Å  
 Dy-O(2A) = 2.323(5) Å  
 Dy-O(3A) = 2.253(5) Å  
 Dy-O(4A) = 2.443(5) Å

Dy-O(1B) = 2.387(4) Å  
 Dy-O(2B) = 2.349(5) Å  
 Dy-O(3B) = 2.244(5) Å  
 Dy-O(4B) = 2.387(5) Å

**[ZnCl(μ-L)Dy(μ-L)ClZn]PF<sub>6</sub>**

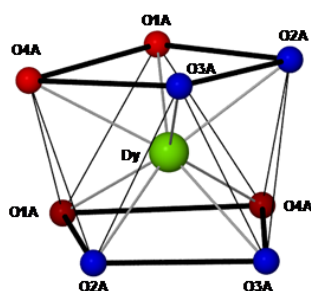

Dy-O(1A) = 2.386(3) Å  
 Dy-O(2A) = 2.275(3) Å  
 Dy-O(3A) = 2.340(3) Å  
 Dy-O(4A) = 2.392(3) Å

**Figure S5.-** DyO<sub>8</sub> coordination polyhedra for [ZnCl(μ-L)Dy(μ-L)ClZn][ZnCl<sub>3</sub>(CH<sub>3</sub>OH)] and [ZnCl(μ-L)Dy(μ-L)ClZn]PF<sub>6</sub>.

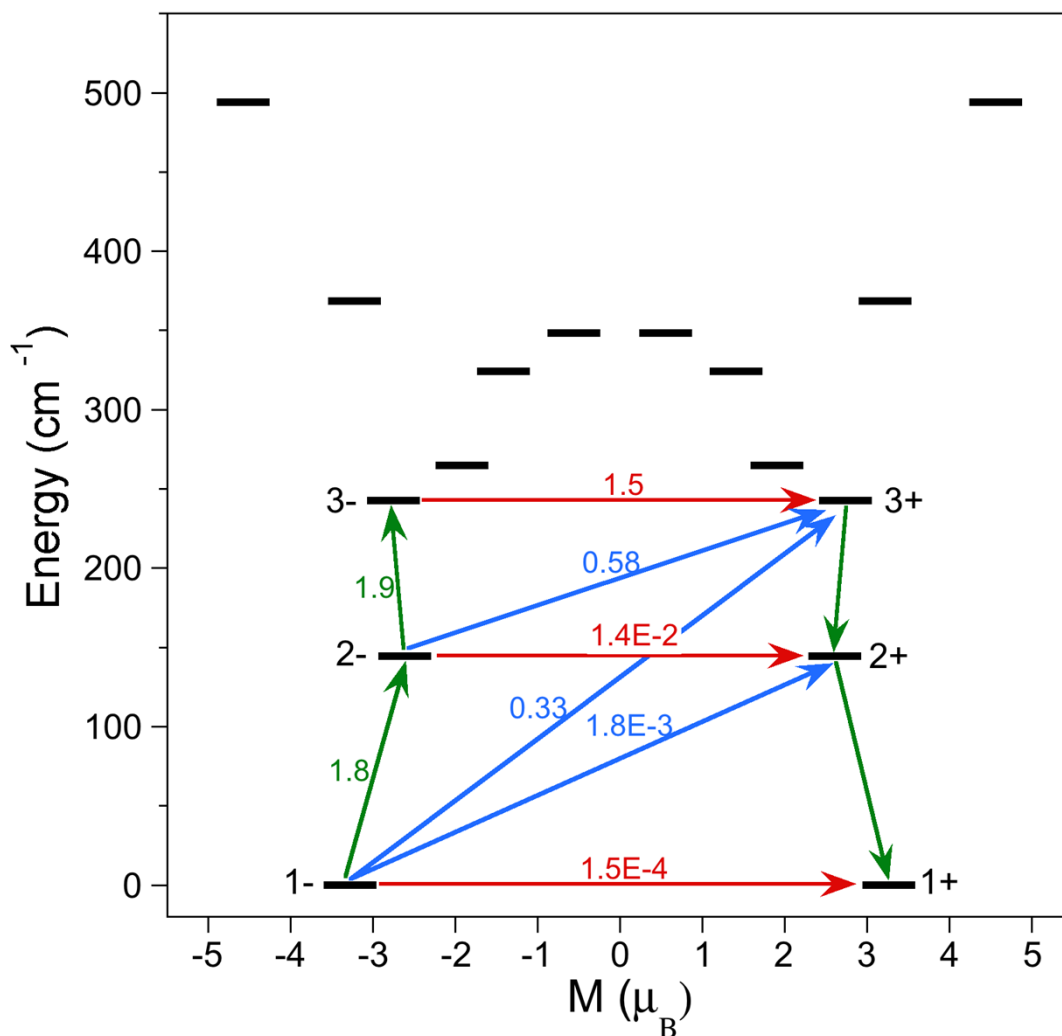

**Figure S6.-** Eight lowest Kramers doublets (KDs) and *ab initio* computed relaxation mechanism in **1**. The thick black lines imply KDs as a function of their magnetic moment along the main anisotropy axis. The red lines correspond to ground state QTM and TA-QM via the first and second excited KDs, blue lines show possible Orbach relaxation processes. The values indicated close to the arrows indicate the matrix elements of the transition magnetic moments.

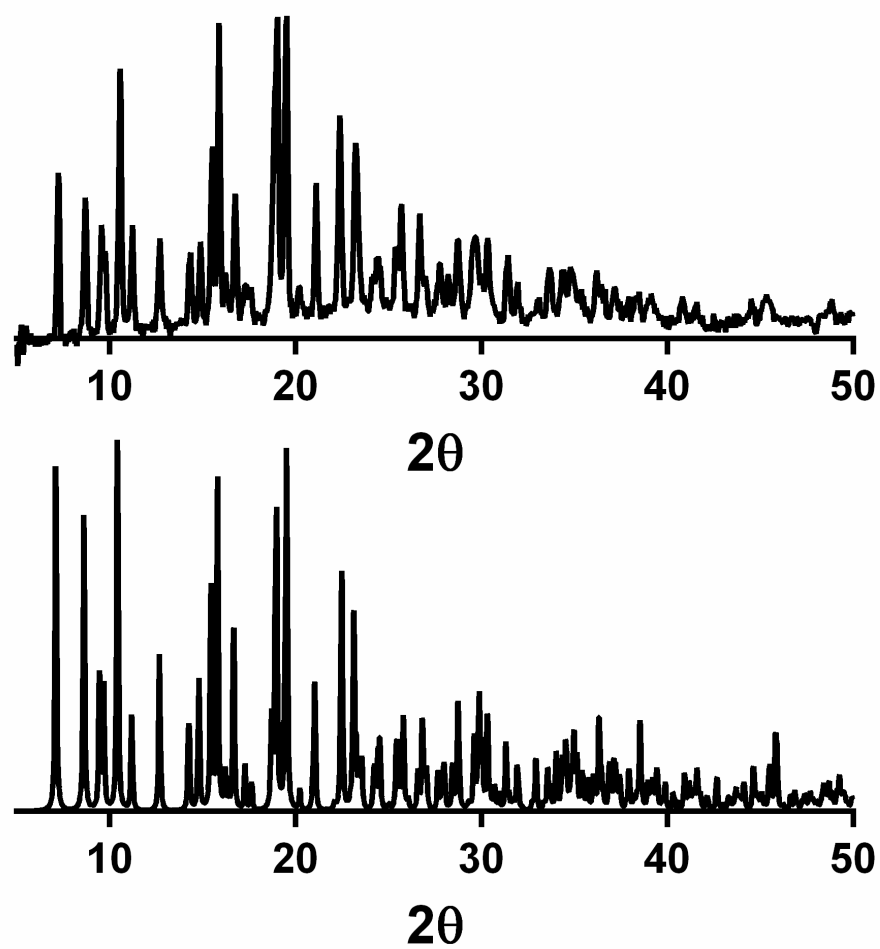

**Figure S7.** Experimental (top) and simulated (bottom) powder X-ray diffractograms for 1.
